# Supplementary material for: Seismicity at the Castor gas reservoir driven by pore pressure diffusion and asperities loading
Source: PubMed Central journal article supplement (PMC8355105; doi:10.1038/s41467-021-24949-1), 2021-08-10
Supplement: 41467_2021_24949_MOESM1_ESM.pdf [file 41467_2021_24949_MOESM1_ESM.pdf]

1 **Supplementary Material**

2

3 **Seismicity at the Castor gas reservoir driven by pore pressure diffusion and asperities loading**

4

5 Simone Cesca<sup>1,\*</sup>, Daniel Stich<sup>2,3</sup>, Francesco Grigoli<sup>4,5</sup>, Alessandro Vuan<sup>6</sup>, José Ángel López-

6 Comino<sup>2,3,7</sup>, Peter Niemz<sup>1,7</sup>, Estefanía Blanch<sup>8,9</sup>, Torsten Dahm<sup>1</sup>, William L. Ellsworth<sup>10</sup>

7

8 1. GFZ German Research Centre for Geosciences Potsdam, Germany

9 2. Instituto Andaluz de Geofísica, Universidad de Granada, Granada, Spain.

10 3. Departamento de Física Teórica y del Cosmos, Universidad de Granada, Granada, Spain

11 4. Department of Earth Sciences, University of Pisa, Italy

12 5. Swiss Seismological Service, ETH Zurich, Zurich, Switzerland

13 6. National Institute of Oceanography and Applied Geophysics - OGS, Trieste, Italy

14 7. Institute of Geosciences, University of Potsdam, Potsdam-Golm, Germany.

15 8. Departament de Física-EPSEB, UPC Barcelona Tech, Barcelona, Spain

16 9. Observatori de l'Ebre (OE), CSIC—Universitat Ramon Llull, Roquetes, Spain

17 10. Department of Geophysics, Stanford University, California, United States

18

19 \* Corresponding author: Dr. Simone Cesca, GFZ German Research Centre for Geosciences

20 Potsdam, Germany, [simone.cesca@gfz-potsdam.de](mailto:simone.cesca@gfz-potsdam.de)

21

22

23

24 **Supplementary Note 1, Depth of injection-induced earthquakes**

25 We recompiled a list of the earthquakes with magnitude 5.0 or larger and occurring since 1.1.2000,  
26 which have been related to fluid injection and/or extraction operations (Supplementary Table 1).

27 The original list, built upon a broad induced seismicity catalog, has been extended for a few more  
28 recent earthquakes. Note that we excluded a few events from the original catalog, for which an  
29 induced origin is not verified, such as those listed in Iran and Nepal. We report for completeness  
30 two disputed cases, those in Lorca (Spain) and Emilia Romagna (Italy). Source depths, as reported  
31 by dedicated seismological studies<sup>1,2,3</sup>, are in the range 5.2±1.4 km and never exceed 8.3 km.

32

| Name                                       | Operations                                   | Date              | Mag                    | Depth                  |
|--------------------------------------------|----------------------------------------------|-------------------|------------------------|------------------------|
| Salton Sea, California (USA)               | EGS circulation                              | 31.08.2005        | 5.1 <sup>1</sup> , 4.6 | 4.0                    |
| <i>Lorca (Spain)</i>                       | <i>Groundwater extraction</i>                | <i>11.05.2011</i> | <i>5.1<sup>1</sup></i> | <i>4.6</i>             |
| <i>Emilia (Italy)</i>                      | <i>Oil and gas,<br/>Wastewater injection</i> | <i>20.05.2012</i> | <i>5.9<sup>1</sup></i> | <i>7.0<sup>2</sup></i> |
| Prague, Oklahoma (USA)                     | Wastewater injection                         | 06.11.2011        | 5.7 <sup>1</sup>       | 5.2                    |
| Raton Basin, Colorado and New Mexico (USA) | Wastewater injection                         | 23.08.2011        | 5.3 <sup>1</sup>       | 4.0                    |
| Fairview, Oklahoma (USA)                   | Wastewater injection                         | 13.02.2016        | 5.1 <sup>1</sup>       | 8.3                    |
| Pohang (South Korea)                       | EGS Stimulation                              | 15.11.2017        | 5.5 <sup>3</sup>       | 4.0                    |
| Pawnee, Oklahoma (USA)                     | Wastewater injection                         | 13.02.2016        | 5.8                    | 5.6                    |
| Cushing, Oklahoma (USA)                    | Wastewater injection                         | 07.11.2016        | 5.0                    | 4.4                    |

33

34 **Supplementary Tab. 1: List of large, recent earthquakes associated to fluid injection,  
35 extraction and/or storage.**

36 The table reports location name, type of operation, date of occurrence, magnitude estimates and  
37 depth (in km). Disputed cases of induced seismicity are in italic. Magnitude and depths are  
38 according to the USGS seismic catalog, except for those cases where a specific reference is  
39 provided.

40 **Supplementary Note 2, Seismic dataset used**

41 We use seismic data from the following networks (Suppl. Fig. 1): ES – Spanish Digital Seismic  
42 Network<sup>4</sup>, CA – Catalan Seismic Network<sup>5</sup>, WM – Western Mediterranean Seismic Network<sup>6</sup>, EB -  
43 Ebre Observatory Regional Seismic Network, IB - IberArray<sup>7</sup>, GR – German Regional Seismic  
44 Network<sup>8</sup> and ILAR array (Eielson, Alaska, US). Seismic data and metadata have been accessed  
45 using IRIS, Geofon, Orfeus and (ICGC) web services, or alternatively kindly provided by the Ebre  
46 Observatory and IGN.

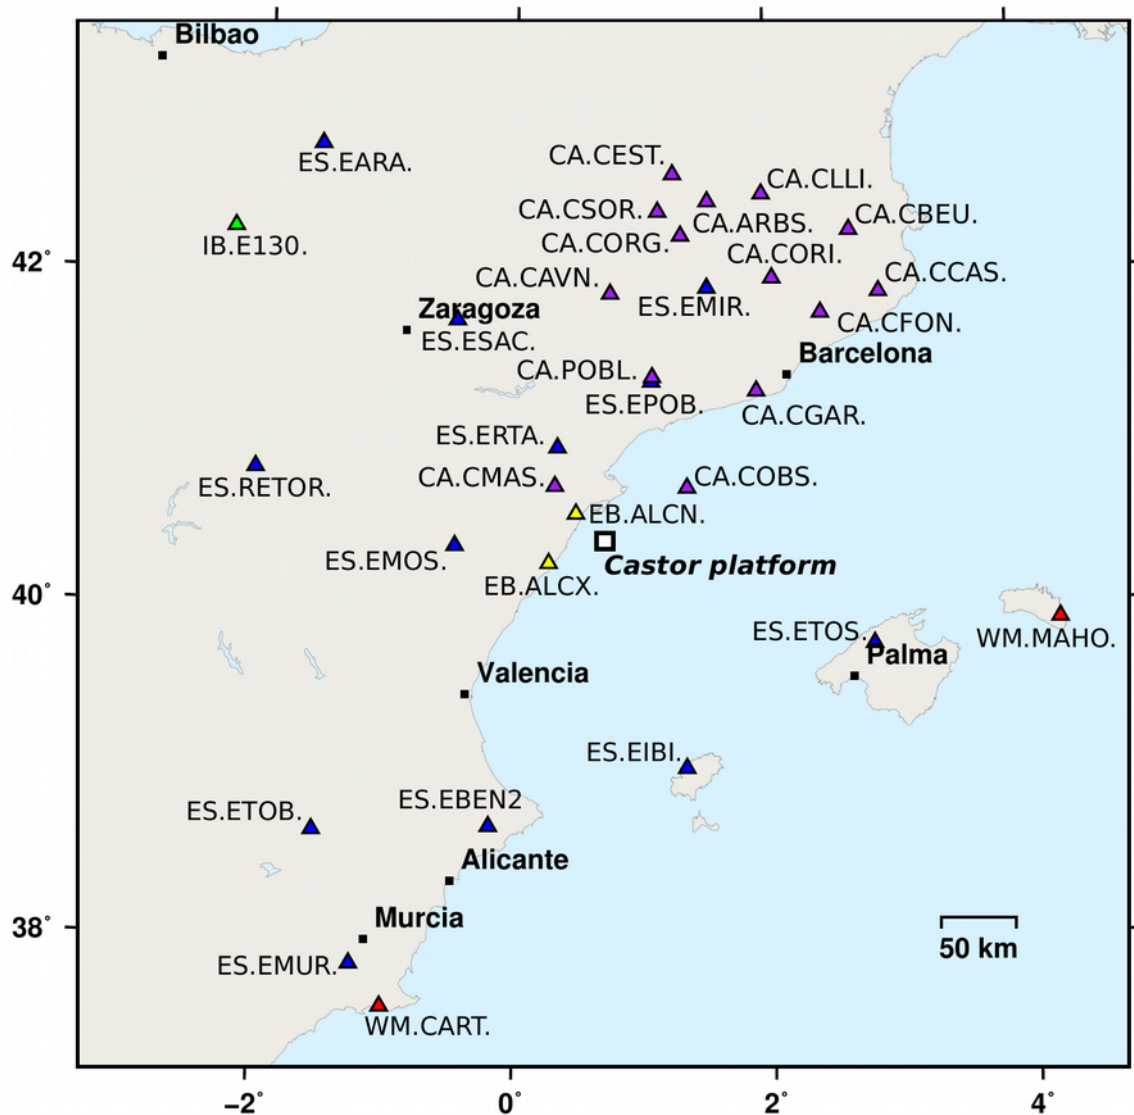

47

48 **Supplementary Fig. 1: Map of the 31 permanent and temporal seismic stations used in this**  
 49 **work.**

50 Station locations are marked by triangles, with colors correspond to different networks: ES –  
 51 Spanish Digital Seismic Network<sup>4</sup>, blue triangles, CA – Catalan Seismic Network<sup>5</sup>, purple triangles,  
 52 WM – Western Mediterranean Seismic Network<sup>6</sup>, red triangles, EB - Ebre Observatory Regional  
 53 Seismic Network, yellow triangles and IB - IberArray<sup>7</sup>, green triangles. All stations are  
 54 instrumented with broadband seismometers, except EB.ALCN and EB.ALCX, which are  
 55 instrumented with short period sensors. A white square denote the location of the Castor platform.  
 56 Major cities are listed by name and their locations indicated by small black squares.

57 **Supplementary Note 3, Crustal velocity models**

58 A variety of crustal velocity models have been used for hypocentral location and moment tensor  
59 determination for the Castor seismicity<sup>9,10</sup>. In this study, we consider the following 1D models  
60 (Suppl. Fig. 2). Model I, proposed for the Iberian Peninsula<sup>11</sup>, is currently used at IGN for standard  
61 location procedures. Model V is a local 1D model extracted<sup>10</sup> from a 2D model<sup>12</sup>, based on the  
62 processing of a seismic transect across the Valencia Through. Model G is a 1D model<sup>10</sup> extracted for  
63 the Castor location out of a 3D model, proposed from a surface-wave ambient noise tomography<sup>10</sup>.  
64

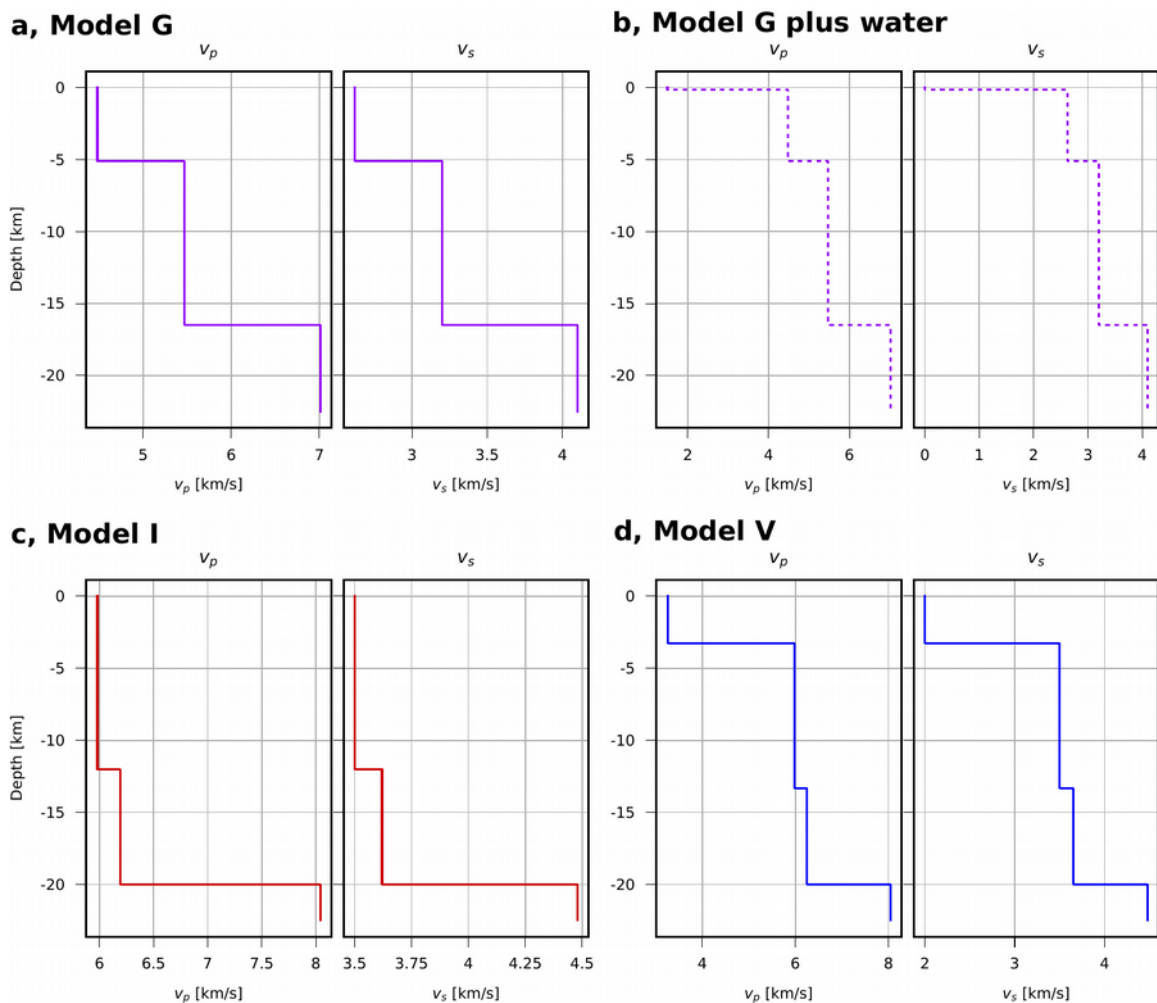

65

66 **Supplementary Fig. 2: Velocity models used in this study.**

67 **a**, Model G<sup>10</sup>, plotted with purple solid lines). **b**, Model G with a shallow water layer, with purple  
68 dashed lines. **c**, Model I<sup>11</sup>, with red solid lines. **d**, Model V<sup>12</sup>, with blue solid lines. For each model  
69 we provide profiles for P and S waves down to 22.5 km, including the crust-mantle boundary.

70 **Supplementary Note 4, Seismic catalogs**

71 We provide three seismic catalogs as supplementary material:

72 a. Template matching catalog, including 3,437 events (Supplementary Dataset 1).

73 b. Relative location catalog based on waveform correlation, including 51 events (Supplementary  
74 Dataset 2).

75 c. Relocated catalog based on tS-tP and distance geometry technique, including 408 events  
76 (Supplementary Dataset 3).

77 Note that event naming and timing may differ from catalog to catalog.

78 Details of moment tensor and directivity inversion results, providing advanced catalogs for selected  
79 largest earthquakes, are provided in the dedicated sections of this document.

80 **Supplementary Note 5, Template matching and statistical properties of the sequence**

81 Template matching is used to detect weaker seismic signals, similar to those of reference events in  
82 the available seismic catalogs, in order to enhance the catalog including weaker events. The  
83 application to the Castor sequence led to the compilation of a catalog of 3,437 earthquakes. We  
84 complement here our manuscript by showing example of detections of weak events by template  
85 matching (Suppl. Figs. 3, 4, 5) and showing the temporal evolution of the extended seismic catalog,  
86 in comparison to the Ebro catalog (Suppl. Fig. 6).

87

88 Statistical analysis of the magnitude distribution of the extended catalog, e.g. by means of b-values,  
89 require the estimation of magnitudes for new detected events. This is achieved knowing the  
90 magnitude of the master events, and the amplitude scaling among master and new detected events.  
91 We noted, however, a discrepancy among magnitude in the original IGN and Ebro catalogs, which  
92 can be attributed to different magnitude estimation approaches<sup>13</sup>. Using the Ebro catalog event, we  
93 confirmed a substantial decrease of the b-value after shut-in (Suppl. Fig. 7), thus confirming  
94 previous similar findings<sup>9</sup>. Using the IGN catalog as reference, we also depict a decrease of the b-  
95 value, but b-values in both phases are underestimated.

96

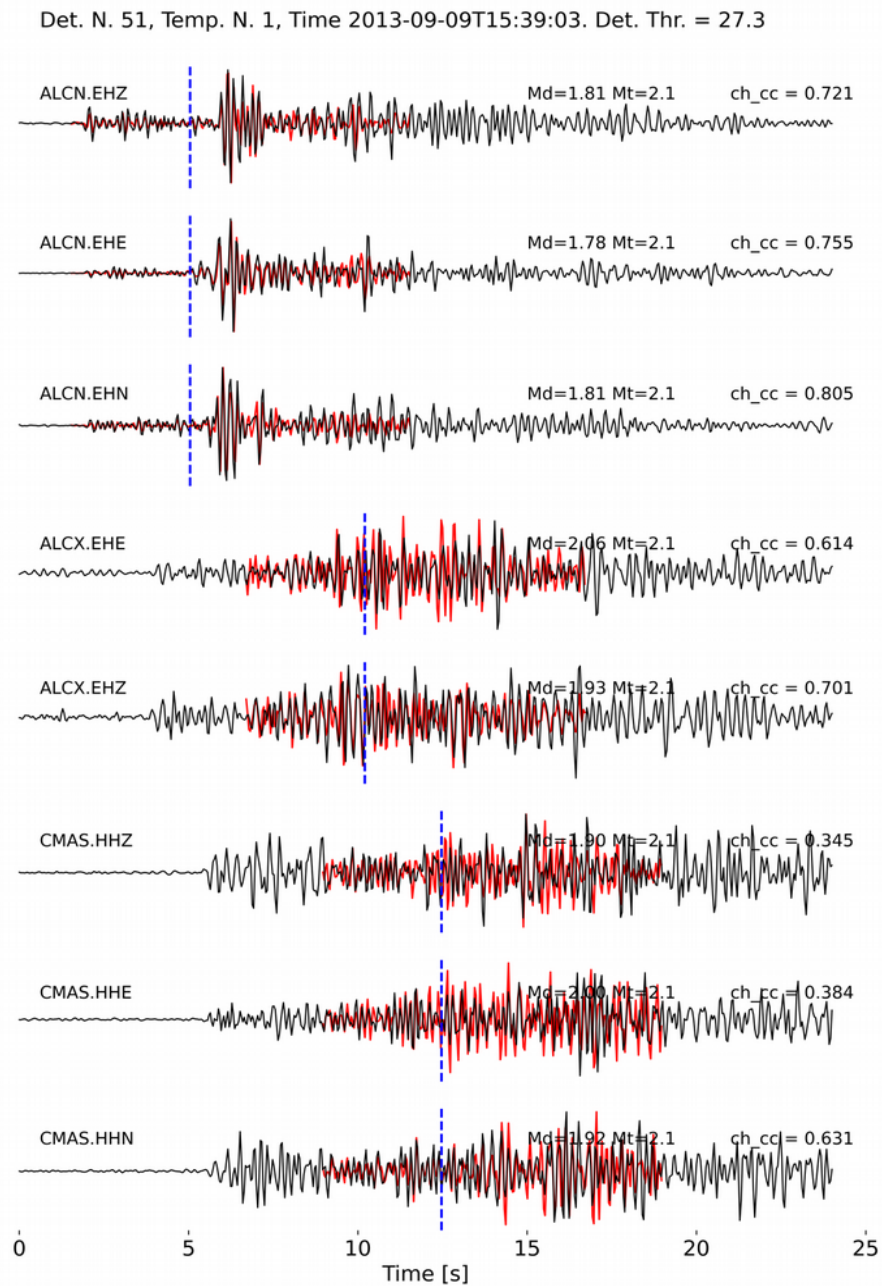

97

98 **Supplementary Fig. 3: Examples of detections using template matching, for a magnitude M1.8**  
 99 **earthquake.**

100 The templates (red traces) are superimposed on the continuous data (black traces). Next to each  
 101 trace we report the station and channel codes (left), single-channel estimated magnitude (Md,  
 102 middle) and the cross-correlation between the template and the new detection (right). The top title  
 103 lists the magnitude of the template, the time of the detection, and the threshold. The dashed blue  
 104 vertical lines represent the theoretical S-wave arrival used as a reference to trim the template  
 105 waveforms.



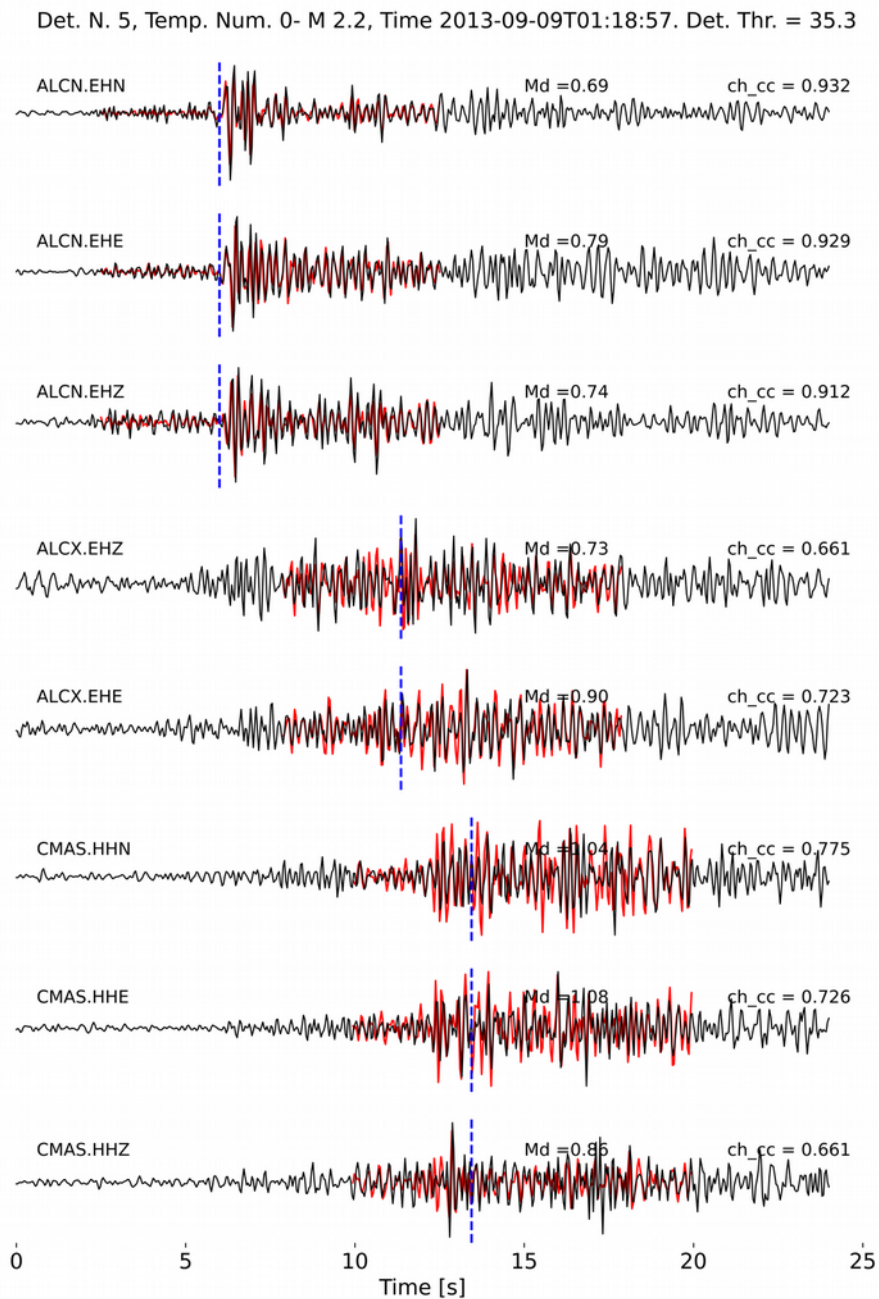

106

107 **Supplementary Fig. 4: Examples of detections using template matching, for a magnitude M0.8**  
 108 **earthquake.**

109 The templates (red traces) are superimposed on the continuous data (black traces). Next to each  
 110 trace we report the station and channel codes (left), single-channel estimated magnitude (Md,  
 111 middle) and the cross-correlation between the template and the new detection (right). The top title  
 112 lists the magnitude of the template, the time of the detection, and the threshold. The dashed blue  
 113 vertical lines represent the theoretical S-wave arrival used as a reference to trim the template  
 114 waveforms.

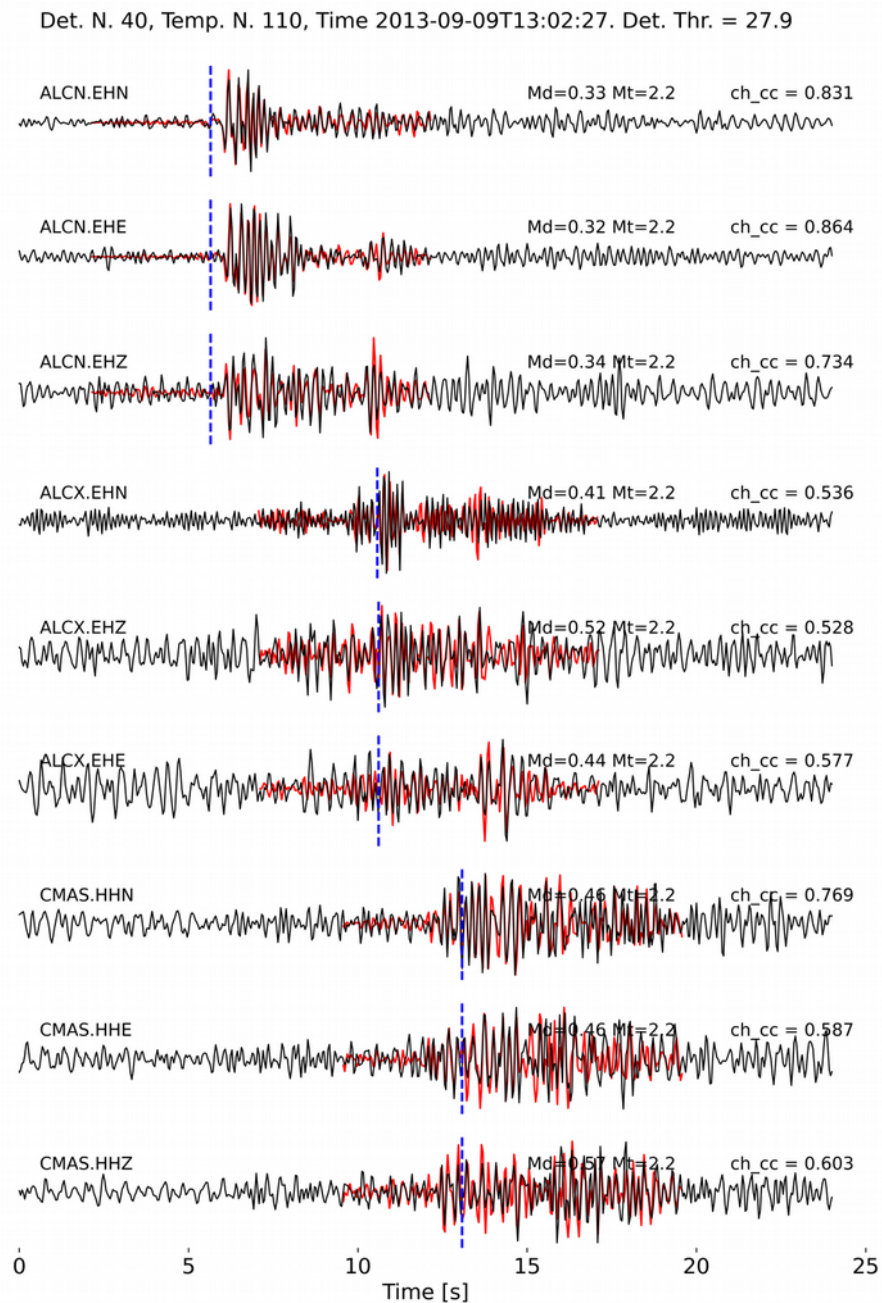

115

116 **Supplementary Fig. 5: Examples of detections using template matching, for a magnitude M0.4**  
 117 **earthquake.**

118 The templates (red traces) are superimposed on the continuous data (black traces). Next to each  
 119 trace we report the station and channel codes (left), single-channel estimated magnitude ( $M_d$ ,  
 120 middle) and the cross-correlation between the template and the new detection (right). The top title  
 121 lists the magnitude of the template, the time of the detection, and the threshold. The dashed blue  
 122 vertical lines represent the theoretical S-wave arrival used as a reference to trim the template  
 123 waveforms.

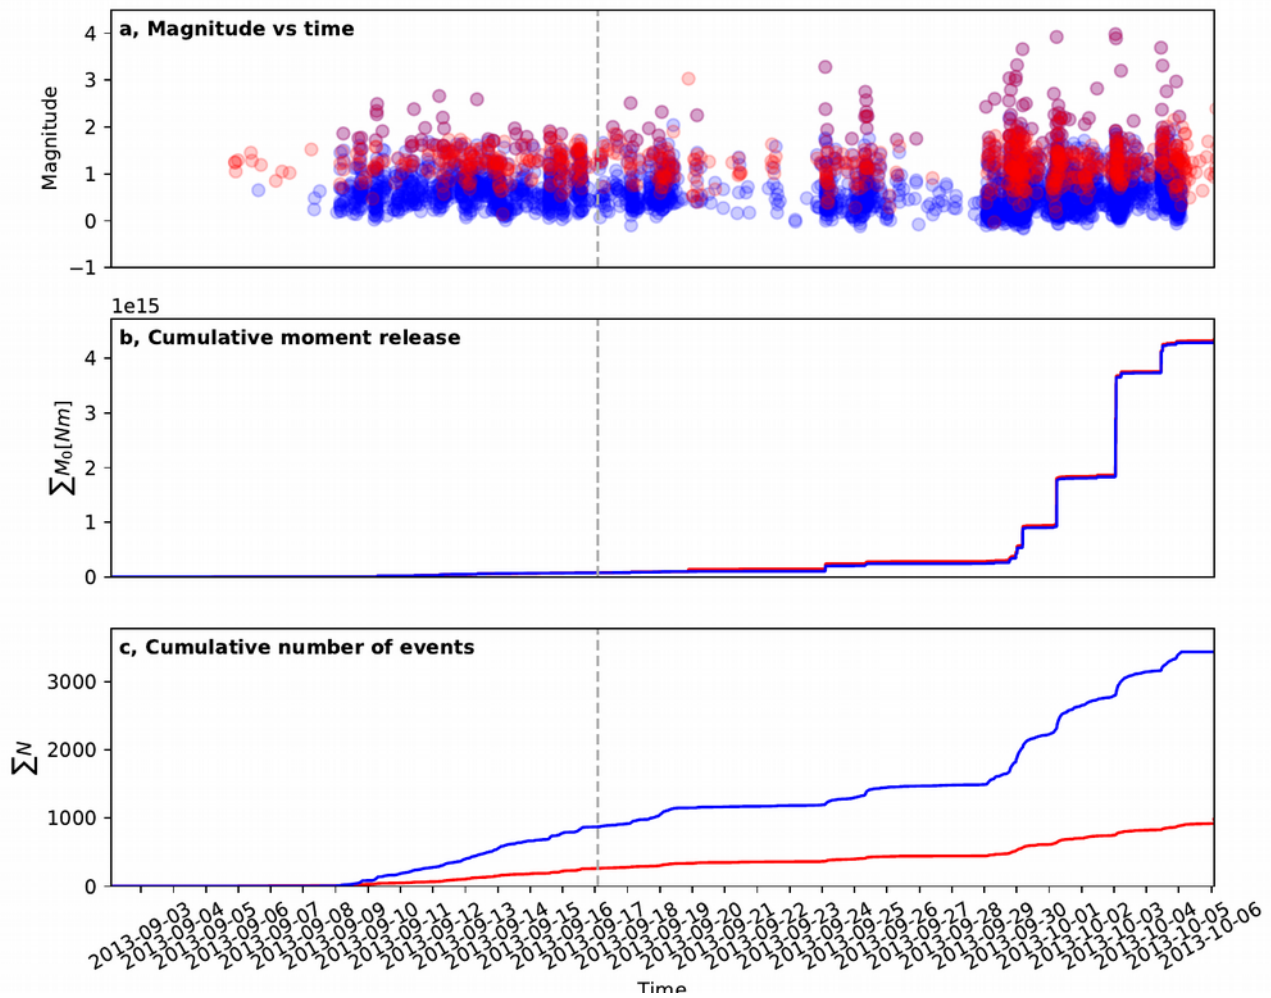

124

125 **Supplementary Fig. 6: Comparison of the original Ebro catalog with the extended catalog**  
 126 **after using template matching.**

127 **a**, Temporal evolution of the magnitudes, **b**, the cumulative scalar moment release and **c**, the  
 128 cumulative number of events. Red color is used for the Ebro catalog, blue for our extended catalog.  
 129 A dashed gray line marks the time of injection stop.

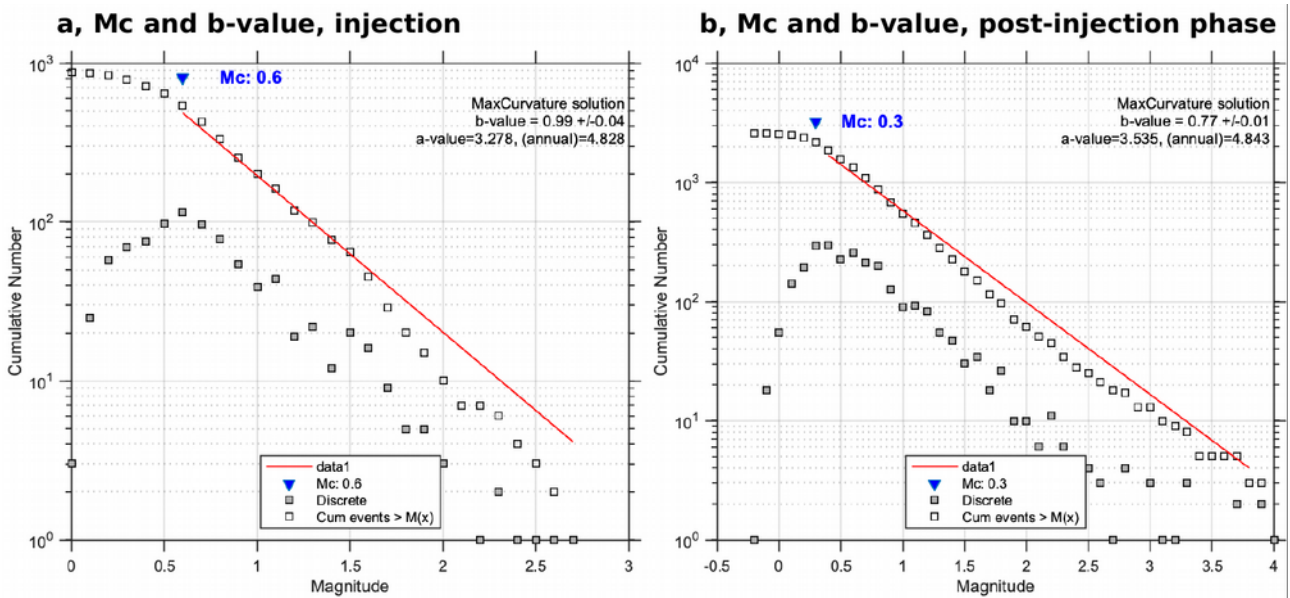

130

131 **Supplementary Fig. 7: Temporal variation of b-values and magnitude of completeness.**

132 Mc and b-value estimates are shown for **a**, the injection and **b**, post-injection phases. The magnitude  
 133 of completeness has been derived using the maximum curvature approach<sup>14</sup>. We considered here the  
 134 extended seismic catalog after applying template matching and with magnitudes based on the Ebro  
 135 catalog.

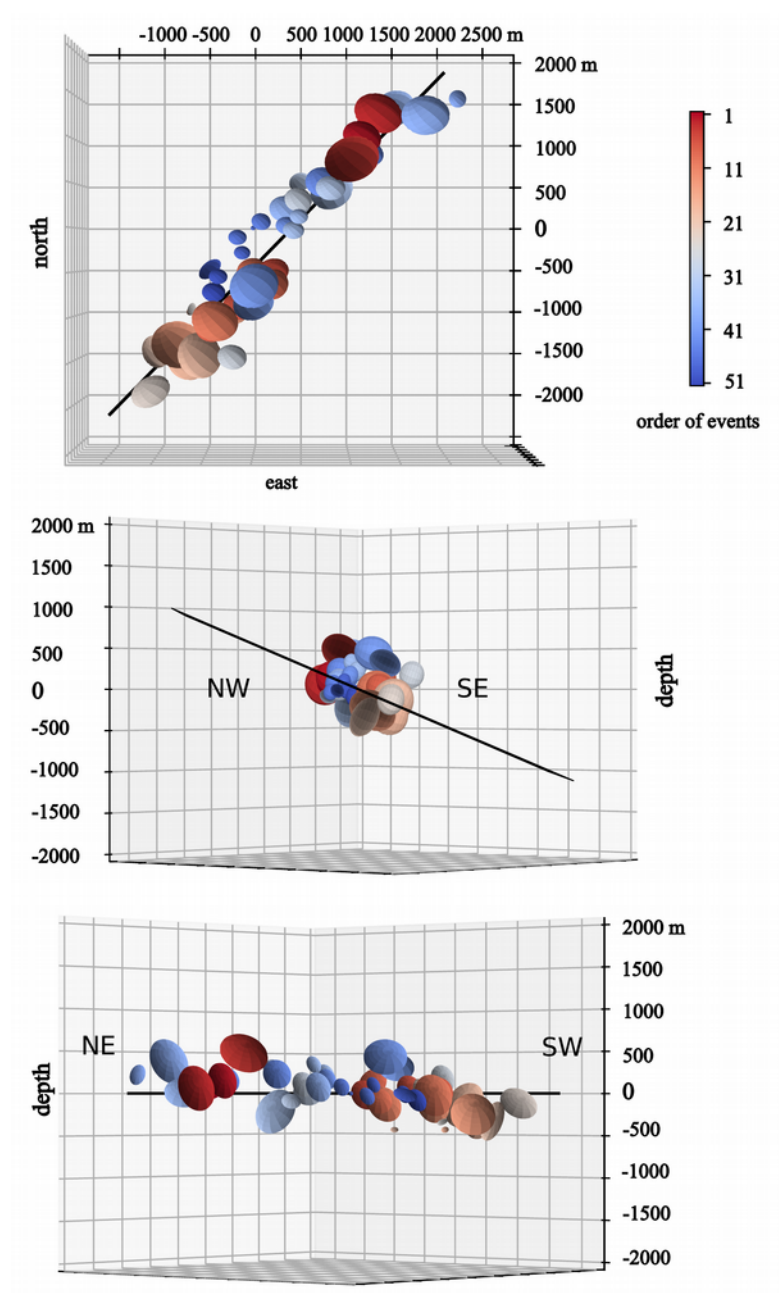

137

138 **Supplementary Fig. 8: Uncertainties of the relocation based on waveform cross-correlation**

139 **relocation.** Uncertainty ellipsoids ( $1\sigma$ ) are plotted for relocated hypocenters, using colors to denote  
140 the temporal evolution (see color bar, reflecting the events chronological order).

141

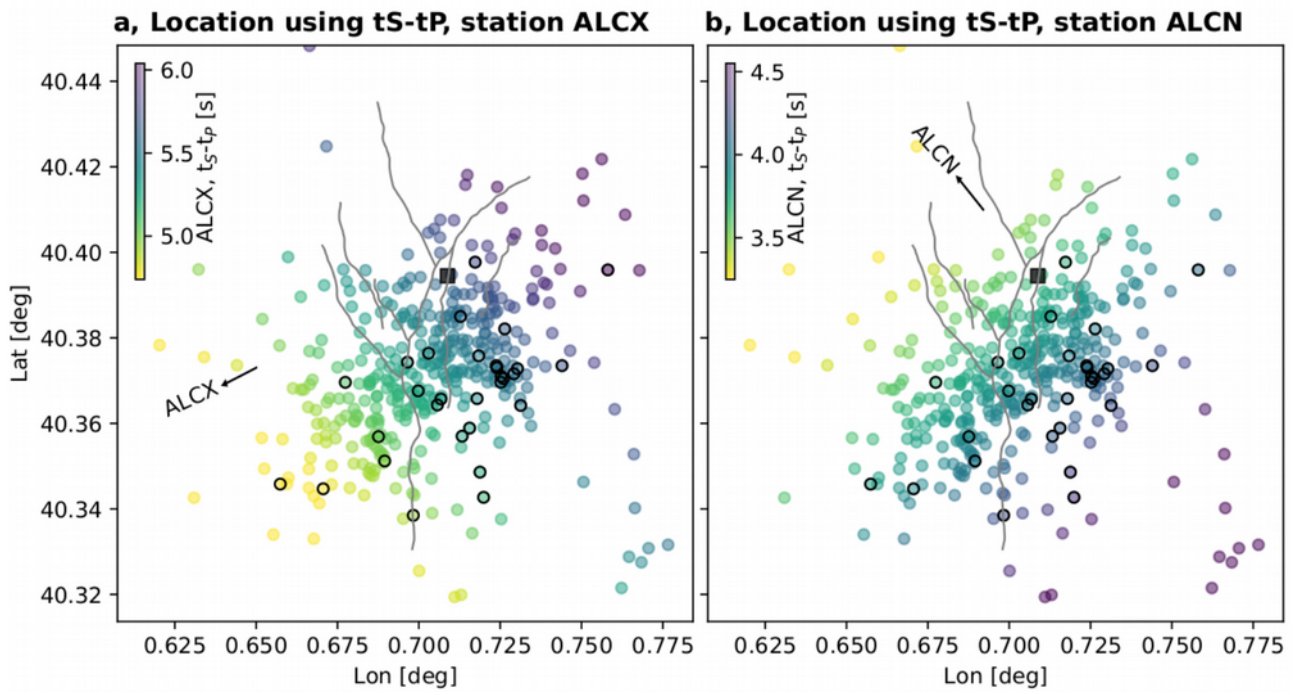

142

143 **Supplementary Fig. 9: Locations based on tS-tP delays**

144 The figures shows earthquake locations coloured according to tS-tP delays **a**, at station ALCX and

145 **b**, at station ALCN. Black circles denote those events used in the waveform correlation location (a),

146 for which S-P time estimates are available.

147

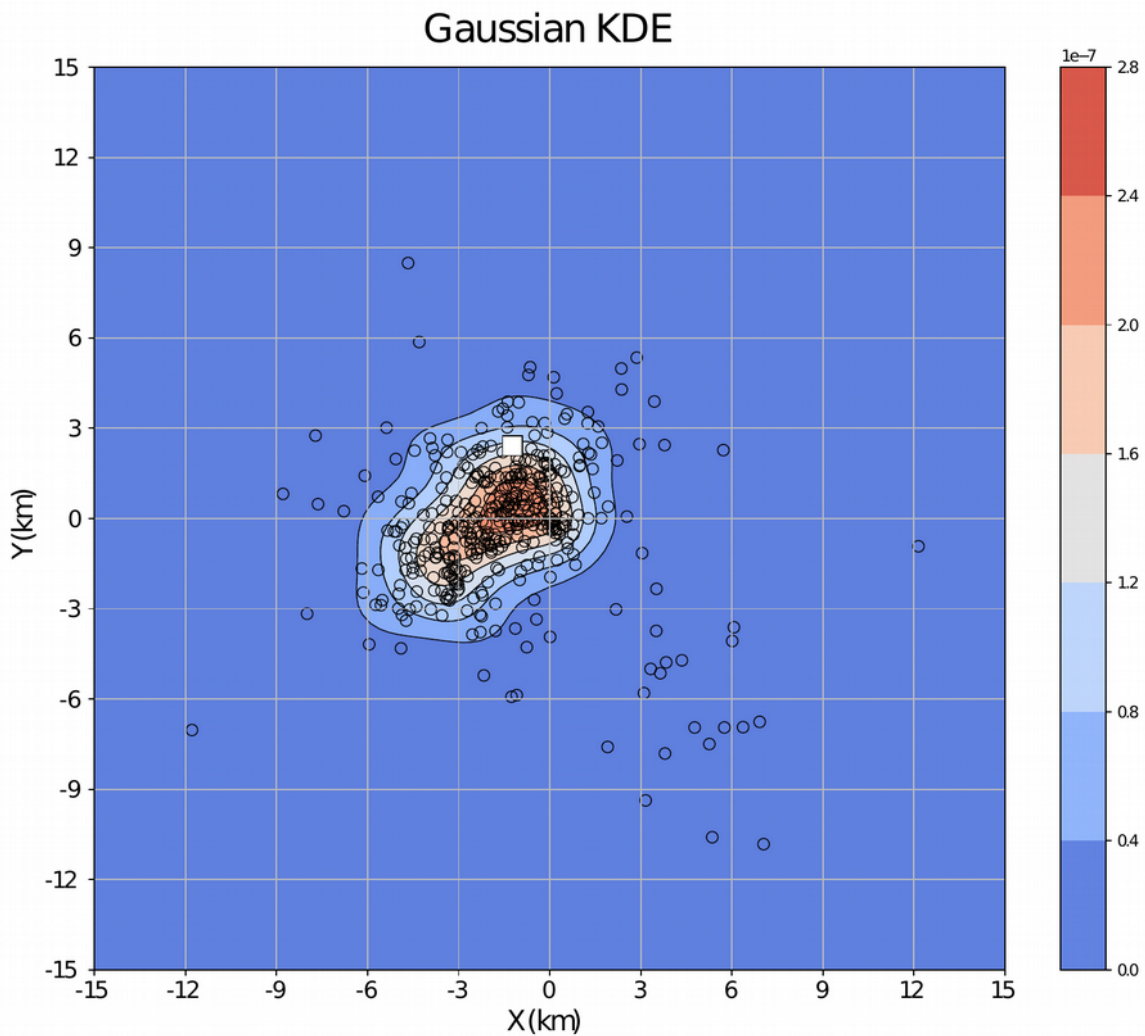

148

149 **Supplementary Fig. 10: Stability of location results for velocity model perturbations**

150 Gaussian Kernel Density Estimation (KDE) of the seismicity relocated 15 times, after perturbing  
 151 the velocity model within the range 4.0–6.0 km/s for the  $V_p$ , (with velocity steps of 0.5 km/s) and  
 152 the  $V_p/V_s$  ratio within the range 1.67–1.79 (with steps of 0.06). The circles represent the event-wise  
 153 mean for each seismic event (relocated 15 times). The color scale from cyan to the red highlights  
 154 the region with highest sample density (the total number of samples of 408 events x 15 iterations).  
 155 The resolved high density region fits well the seismicity distribution, as an indication of the stability  
 156 of the location results against velocity variation. This is also confirmed by a relatively small event-  
 157 wise standard deviation which is of the order of 0.5 km for most of the events.

158 **Supplementary Note 7, Moment tensor inversion**

159 We report here the full table of moment tensor (MT) inversion results (Supplementary Table 2).  
160 Solutions are reported for 11 largest events in the Castor sequence, for which we can obtain robust  
161 results. Suppl. Table 2 report selected source parameters with their uncertainties and quantify some  
162 minor differences when assuming the three crustal models G, I and V to model synthetic  
163 seismograms and spectra. Moment tensor solutions are classified into A, B, and C quality,  
164 depending on their magnitudes (quality A corresponds to Mw 4.0-4.1, quality B to Mw 3.3-3.9,  
165 quality C to Mw 3.0-3.2). Solutions C are less stable, due to the weak magnitudes and acceptable  
166 signal-to-noise ratio at a lower number of close distance seismic stations. Suppl. Figs. 11-13 provide  
167 a complete overview on data fit for a selected earthquake (October 2, 2013, 23:06 UTC),  
168 complementing Fig. 3.

169



|                        |       | Model G |      |      |      |      | Model I |      |      |      |      | Model V |      |      |      |      |
|------------------------|-------|---------|------|------|------|------|---------|------|------|------|------|---------|------|------|------|------|
| Event                  | Qual. | Mw      | mean | std  | min  | max  | Mw      | mean | std  | min  | max  | Mw      | mean | std  | min  | max  |
| Castor_20130924_002150 | B     | 3.54    | 3.46 | 0.05 | 3.41 | 3.50 | 3.68    | 3.69 | 0.04 | 3.65 | 3.73 | 3.46    | 3.48 | 0.09 | 3.39 | 3.57 |
| Castor_20130929_163623 | B     | 3.41    | 3.43 | 0.05 | 3.38 | 3.48 | 3.70    | 3.68 | 0.04 | 3.64 | 3.72 | 3.36    | 3.38 | 0.08 | 3.30 | 3.46 |
| Castor_20130929_211505 | C     | 3.22    | 3.25 | 0.07 | 3.18 | 3.32 | 3.46    | 3.44 | 0.05 | 3.38 | 3.49 | 3.23    | 3.23 | 0.06 | 3.17 | 3.29 |
| Castor_20130929_212316 | C     | 3.02    | 3.11 | 0.07 | 3.05 | 3.18 | 3.38    | 3.33 | 0.06 | 3.27 | 3.39 | 3.05    | 3.10 | 0.06 | 3.04 | 3.16 |
| Castor_20130929_221548 | B     | 3.62    | 3.65 | 0.05 | 3.60 | 3.70 | 3.86    | 3.87 | 0.04 | 3.83 | 3.91 | 3.66    | 3.67 | 0.05 | 3.62 | 3.72 |
| Castor_20130930_022116 | B     | 3.91    | 3.85 | 0.04 | 3.81 | 3.89 | 4.08    | 4.07 | 0.03 | 4.04 | 4.10 | 3.89    | 3.85 | 0.04 | 3.81 | 3.89 |
| Castor_20131001_033244 | A     | 4.07    | 4.10 | 0.05 | 4.05 | 4.15 | 4.34    | 4.32 | 0.03 | 4.29 | 4.35 | 4.10    | 4.10 | 0.07 | 4.07 | 4.17 |
| Castor_20131002_230649 | A     | 4.11    | 4.05 | 0.05 | 4.00 | 4.10 | 4.27    | 4.30 | 0.03 | 4.27 | 4.33 | 4.00    | 3.96 | 0.08 | 3.88 | 4.04 |
| Castor_20131002_232929 | A     | 3.96    | 3.96 | 0.04 | 3.92 | 4.00 | 4.19    | 4.18 | 0.04 | 4.14 | 4.22 | 3.94    | 3.95 | 0.06 | 3.89 | 4.01 |
| Castor_20131004_084948 | B     | 3.66    | 3.65 | 0.04 | 3.61 | 3.69 | 3.87    | 3.88 | 0.04 | 3.84 | 3.91 | 3.62    | 3.67 | 0.06 | 3.61 | 3.73 |
| Castor_20131004_095519 | B     | 3.45    | 3.46 | 0.05 | 3.41 | 3.51 | 3.68    | 3.69 | 0.04 | 3.65 | 3.73 | 3.42    | 3.47 | 0.07 | 3.40 | 3.54 |
| Maximum                |       | 4.11    | 4.10 |      |      |      | 4.34    | 4.32 |      |      |      | 4.10    | 4.10 |      |      |      |
| Event                  |       | Depth   | mean | std  | min  | max  | Depth   | mean | std  | min  | max  | Depth   | mean | std  | min  | max  |
| Castor_20130924_002150 | B     | 1.6     | 1.9  | 1.5  | 0.4  | 3.4  | 2.0     | 2.9  | 2.6  | 0.3  | 5.5  | 4.3     | 7.1  | 4.3  | 2.8  | 11.4 |
| Castor_20130929_163623 | B     | 1.8     | 2.2  | 2.0  | 0.2  | 4.2  | 1.8     | 2.9  | 2.7  | 0.2  | 5.6  | 4.2     | 6.4  | 4.2  | 2.2  | 10.6 |
| Castor_20130929_211505 | C     | 1.7     | 6.7  | 5.0  | 1.7  | 11.7 | 2.1     | 5.0  | 4.1  | 0.9  | 9.1  | 8.7     | 10.3 | 3.0  | 7.3  | 13.3 |
| Castor_20130929_212316 | C     | 1.1     | 6.1  | 5.0  | 1.1  | 11.1 | 3.6     | 6.9  | 4.4  | 2.5  | 11.3 | 3.6     | 9.8  | 4.3  | 5.5  | 14.1 |
| Castor_20130929_221548 | B     | 1.9     | 4.0  | 3.4  | 0.6  | 7.4  | 2.6     | 4.3  | 3.1  | 1.2  | 7.4  | 8.0     | 9.2  | 3.7  | 5.5  | 12.9 |
| Castor_20130930_022116 | B     | 1.5     | 3.8  | 2.7  | 1.1  | 6.5  | 2.8     | 4.3  | 2.5  | 1.8  | 6.8  | 8.1     | 7.8  | 3.3  | 4.5  | 11.1 |
| Castor_20131001_033244 | A     | 2.3     | 2.2  | 0.8  | 1.4  | 3.0  | 2.1     | 2.4  | 1.0  | 1.4  | 3.4  | 3.5     | 6.3  | 3.3  | 3.0  | 9.6  |
| Castor_20131002_230649 | A     | 1.6     | 1.9  | 0.8  | 1.1  | 2.7  | 2.2     | 2.2  | 1.1  | 1.1  | 3.3  | 3.9     | 3.7  | 2.8  | 0.9  | 6.5  |
| Castor_20131002_232929 | A     | 2.9     | 2.3  | 0.7  | 1.6  | 3.0  | 3.0     | 2.7  | 1.3  | 1.4  | 4.0  | 4.3     | 5.3  | 2.8  | 2.5  | 8.1  |
| Castor_20131004_084948 | B     | 2.6     | 2.3  | 1.1  | 1.2  | 3.4  | 2.9     | 3.1  | 2.3  | 0.8  | 5.4  | 4.4     | 6.3  | 3.5  | 4.0  | 9.8  |
| Castor_20131004_095519 | B     | 3.1     | 3.1  | 2.5  | 0.6  | 5.6  | 2.8     | 3.0  | 1.5  | 1.5  | 4.5  | 3.8     | 6.2  | 3.1  | 3.1  | 9.3  |
| Mean (Quality A+B)     |       | 2.14    | 2.63 | 1.72 |      |      | 2.47    | 3.09 |      |      |      | 4.94    | 6.48 |      |      |      |
| Event                  |       | Strike  | mean | std  | min  | max  | Strike  | mean | std  | min  | max  | Strike  | mean | std  | min  | max  |
| Castor_20130924_002150 | B     | 45      | 67   | 41   | 26   | 108  | 44      | 66   | 39   | 27   | 105  | 52      | 81   | 19   | 62   | 100  |
| Castor_20130929_163623 | B     | 43      | 59   | 43   | 16   | 102  | 43      | 47   | 10   | 37   | 57   | 45      | 64   | 43   | 21   | 107  |
| Castor_20130929_211505 | C     | 25      | 55   | 51   | 4    | 106  | 34      | 85   | 80   | 5    | 165  | 239     | 205  | 67   | 138  | 272  |
| Castor_20130929_212316 | C     | 43      | 29   | 89   | -60  | 118  | 49      | 67   | 58   | 9    | 125  | 44      | 79   | 70   | 9    | 149  |
| Castor_20130929_221548 | B     | 38      | 51   | 40   | 11   | 91   | 37      | 59   | 49   | 10   | 108  | 38      | 89   | 72   | 17   | 161  |
| Castor_20130930_022116 | B     | 41      | 48   | 30   | 18   | 78   | 40      | 47   | 35   | 12   | 82   | 45      | 76   | 78   | -2   | 154  |
| Castor_20131001_033244 | A     | 41      | 57   | 46   | 11   | 103  | 41      | 52   | 31   | 21   | 83   | 49      | 82   | 73   | 9    | 155  |
| Castor_20131002_230649 | A     | 44      | 59   | 53   | 6    | 112  | 42      | 43   | 13   | 30   | 56   | 43      | 81   | 62   | 19   | 143  |
| Castor_20131002_232929 | A     | 43      | 50   | 41   | 9    | 91   | 38      | 65   | 55   | 10   | 120  | 39      | 78   | 71   | 7    | 149  |
| Castor_20131004_084948 | B     | 47      | 56   | 31   | 25   | 87   | 43      | 59   | 38   | 21   | 97   | 48      | 69   | 55   | 14   | 124  |
| Castor_20131004_095519 | B     | 39      | 45   | 22   | 23   | 67   | 39      | 52   | 36   | 16   | 88   | 42      | 72   | 65   | 7    | 137  |
| Mean (Quality A+B)     |       | 42      | 55   | 39   |      |      | 41      | 54   | 34   |      |      | 45      | 77   | 60   |      |      |
| St. Dev. (Quality A+B) |       | 3       | 7    |      |      |      | 2       | 8    |      |      |      | 5       | 8    |      |      |      |
| Event                  |       | Dip     | mean | std  | min  | max  | Dip     | mean | std  | min  | max  | Dip     | mean | std  | min  | max  |
| Castor_20130924_002150 | B     | 34      | 55   | 13   | 42   | 68   | 59      | 62   | 12   | 50   | 74   | 44      | 64   | 12   | 52   | 76   |
| Castor_20130929_163623 | B     | 54      | 53   | 14   | 39   | 67   | 41      | 49   | 10   | 39   | 59   | 62      | 61   | 13   | 48   | 74   |
| Castor_20130929_211505 | C     | 66      | 72   | 12   | 60   | 84   | 73      | 67   | 13   | 54   | 80   | 45      | 61   | 19   | 42   | 80   |
| Castor_20130929_212316 | C     | 79      | 74   | 13   | 61   | 87   | 48      | 54   | 15   | 39   | 69   | 81      | 57   | 16   | 41   | 73   |
| Castor_20130929_221548 | B     | 46      | 46   | 12   | 34   | 58   | 54      | 54   | 12   | 42   | 66   | 60      | 58   | 13   | 45   | 71   |
| Castor_20130930_022116 | B     | 31      | 45   | 12   | 33   | 57   | 47      | 52   | 10   | 42   | 62   | 49      | 55   | 15   | 40   | 70   |
| Castor_20131001_033244 | A     | 57      | 51   | 16   | 35   | 67   | 52      | 57   | 13   | 44   | 70   | 53      | 62   | 14   | 48   | 76   |
| Castor_20131002_230649 | A     | 41      | 50   | 15   | 35   | 65   | 50      | 47   | 11   | 36   | 58   | 64      | 70   | 13   | 57   | 83   |
| Castor_20131002_232929 | A     | 58      | 59   | 13   | 46   | 72   | 57      | 64   | 12   | 52   | 76   | 79      | 70   | 15   | 55   | 85   |
| Castor_20131004_084948 | B     | 53      | 56   | 11   | 45   | 67   | 58      | 63   | 12   | 51   | 75   | 65      | 64   | 12   | 52   | 76   |
| Castor_20131004_095519 | B     | 62      | 54   | 12   | 42   | 66   | 63      | 60   | 12   | 48   | 72   | 58      | 65   | 13   | 52   | 78   |
| Mean (Quality A+B)     |       | 48      | 52   | 13   |      |      | 53      | 56   | 12   |      |      | 59      | 63   | 13   |      |      |
| St. Dev. (Quality A+B) |       | 11      | 5    |      |      |      | 7       | 6    |      |      |      | 10      | 5    |      |      |      |
| Event                  |       | Rake    | mean | std  | min  | max  | Rake    | mean | std  | min  | max  | Rake    | mean | std  | min  | max  |
| Castor_20130924_002150 | B     | 4       | 16   | 73   | -57  | 89   | -4      | 10   | 74   | -64  | 84   | 7       | -36  | 85   | -121 | 49   |
| Castor_20130929_163623 | B     | 1       | 0    | 52   | -52  | 52   | -1      | 3    | 18   | -15  | 21   | 3       | -11  | 70   | -81  | 59   |
| Castor_20130929_211505 | C     | -42     | -32  | 46   | -78  | 14   | -27     | -37  | 77   | -114 | 40   | 8       | -51  | 79   | -130 | 28   |
| Castor_20130929_212316 | C     | -30     | -20  | 130  | -150 | 110  | 6       | -15  | 59   | -74  | 44   | -6      | -17  | 68   | -85  | 51   |
| Castor_20130929_221548 | B     | -18     | -23  | 51   | -74  | 28   | -12     | -11  | 72   | -83  | 61   | -16     | -45  | 93   | -138 | 48   |
| Castor_20130930_022116 | B     | -9      | -23  | 39   | -62  | 16   | -15     | -14  | -37  | 23   | -51  | -14     | -19  | 69   | -88  | 50   |
| Castor_20131001_033244 | A     | 0       | 0    | 46   | -46  | 46   | 0       | 12   | 51   | -39  | 63   | 9       | -27  | 84   | -111 | 57   |
| Castor_20131002_230649 | A     | 0       | -9   | 49   | -58  | 40   | 0       | -1   | 14   | -15  | 13   | 10      | -24  | 92   | -116 | 68   |
| Castor_20131002_232929 | A     | 10      | 6    | 49   | -43  | 55   | 12      | 28   | 72   | -44  | 100  | 25      | -20  | 75   | -95  | 55   |
| Castor_20131004_084948 | B     | 4       | 7    | 52   | -45  | 59   | -3      | 3    | 63   | -60  | 66   | 2       | -22  | 73   | -95  | 51   |
| Castor_20131004_095519 | B     | -3      | 4    | 39   | -35  | 43   | 9       | 16   | 64   | -48  | 80   | 11      | -25  | 77   | -102 | 52   |
| Mean (Quality A)       |       | -1      | -2   | 50   |      |      | -2      | 5    | 43   |      |      | 4       | -25  | 80   |      |      |
| St. Dev. (Quality A)   |       | 8       | 13   |      |      |      | 9       | 13   |      |      |      | 13      | 10   |      |      |      |

170

171 **Supplementary Tab. 2: Summary of MT inversion results.**

172 We obtain MT solutions for 11 earthquakes with quality A to C (magnitude-based), using models G  
 173 (purple), I (blue) and V (red), reporting magnitude (Mw), depth (km), strike, dip and rake (deg) for  
 174 the best (using all data) and mean (based on data bootstrap) solutions, with their uncertainties, as  
 175 well as average solutions for the whole sequence.

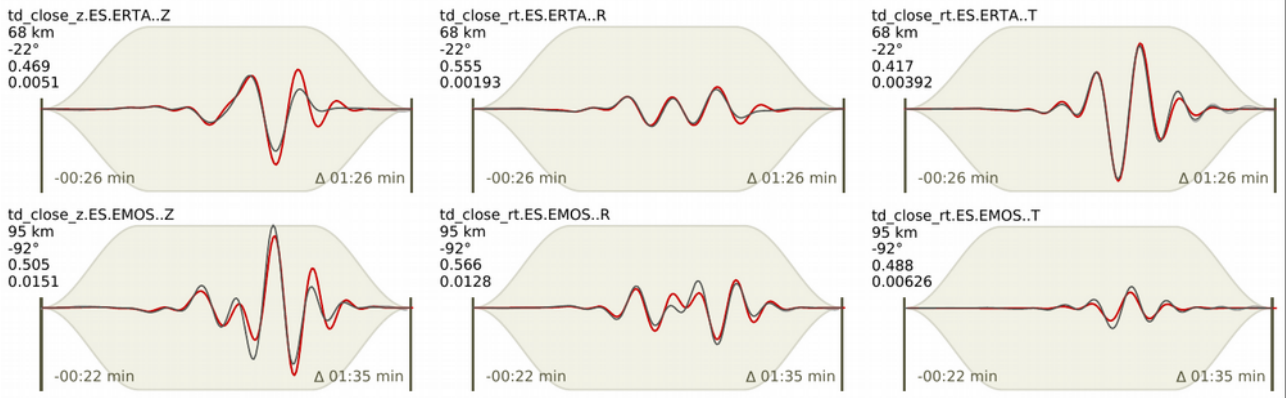

176

177 **Supplementary Fig. 11: Fit of full waveforms in time domain, for the October 2, 2013, UTC**

178 **23:06 Castor earthquake, for the closest broadband stations (below 100 km).**

179 Observed (black lines) and synthetics (red lines) displacement seismograms (bandpass 0.02-0.05

180 Hz) are fitted for the vertical (A), radial (B) and transversal (C) components (fitting full waveforms

181 in the time domain, synthetic and observed waveform amplitudes are comparable). Station

182 information is provided on the top left part of each waveform (as in Fig. 3).

183

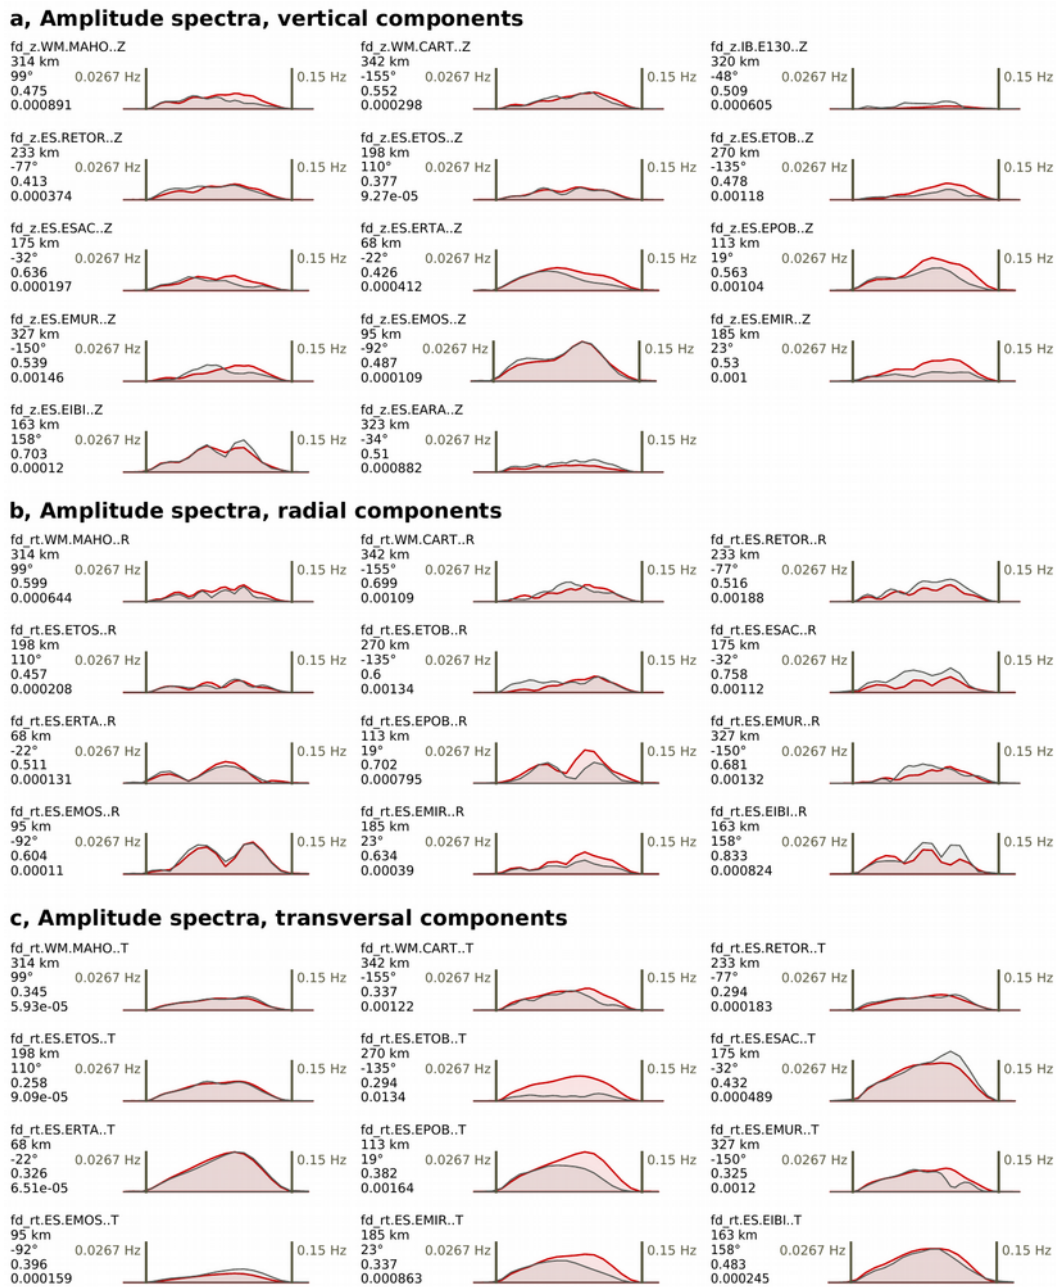

184

185 **Supplementary Fig. 12: Fit of full waveform amplitude spectra, for the October 2, 2013, UTC**  
 186 **23:06 Castor earthquake.**

187 Observed (black lines) and synthetics (red lines) displacement spectra are fitted **a**, for the vertical,  
 188 **b**, radial and **c**, transversal components (the frequency band is indicated in the vertical bars). Station  
 189 information is provided on the top left part of each waveform (as in Fig. 3).

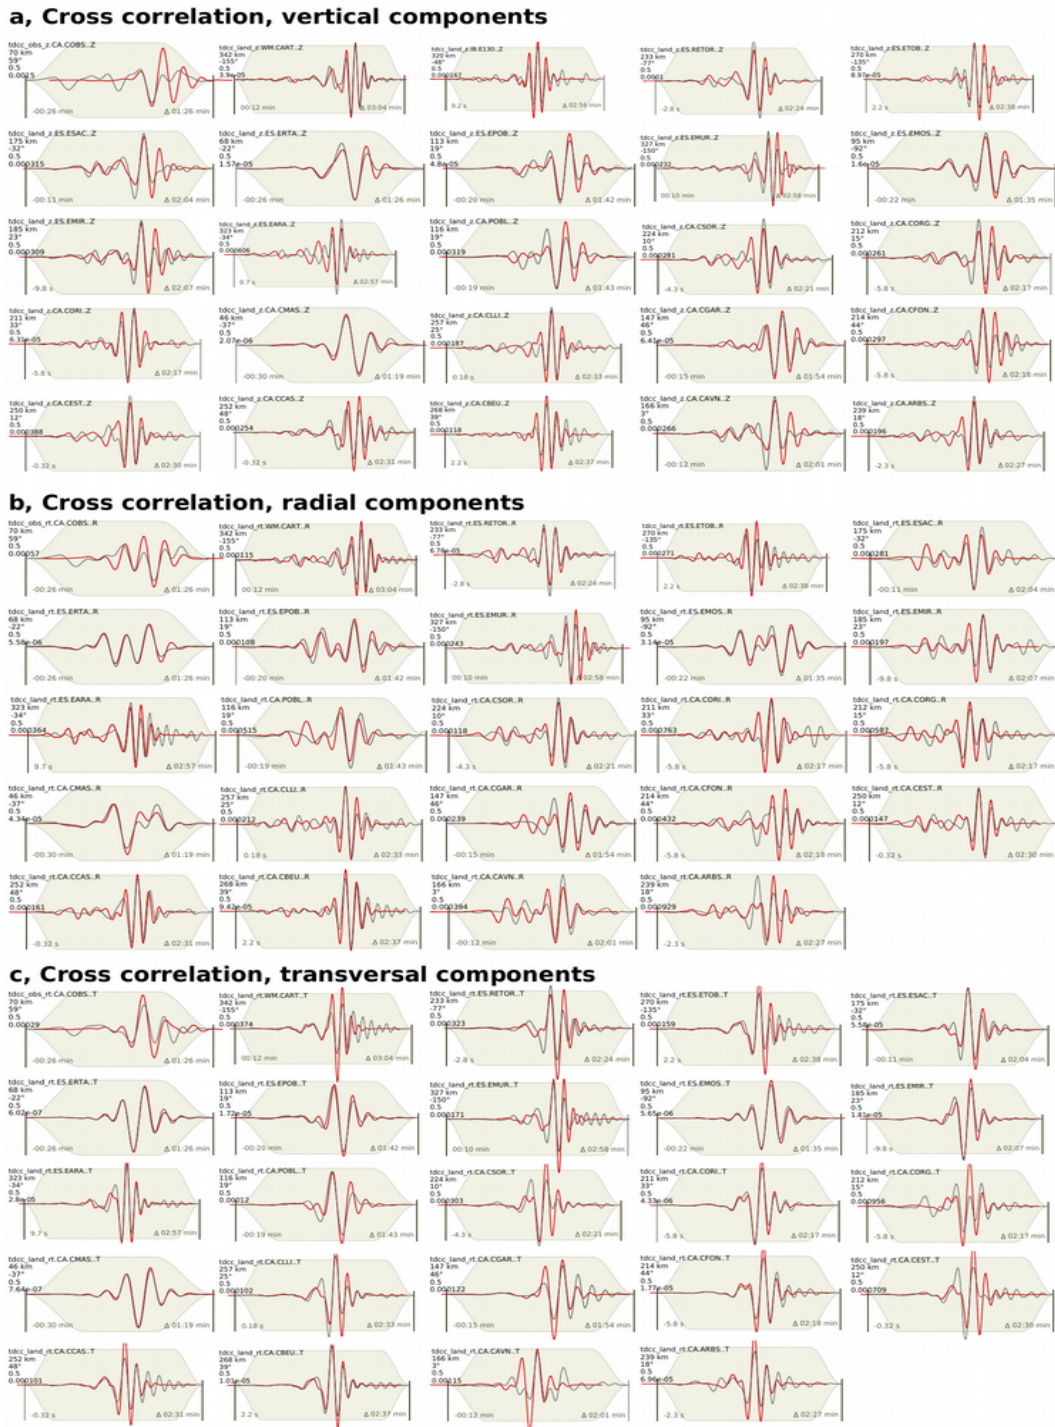

190

191 **Supplementary Fig. 13: Fit of full waveforms by cross correlations, for the October 2, 2013,**

192 **UTC 23:06 Castor earthquake.**

193 Observed (black lines) and synthetics (red lines) displacement seismograms (bandpass 0.02-0.05

194 Hz) are fitted for **a**, the vertical, **b**, radial and **c**, transversal components (fitting by cross correlation,

195 synthetic and observed waveform amplitudes may differ). Station information is provided on the top

196 left part of each waveform (as in Fig. 3).

197 **Supplementary Note 8, Depth estimation using depth-phases**

198 For this analysis Green's functions are computed using a reflectivity approach (QSEIS<sup>15</sup>), and  
199 considering a local crustal model at the source (here model G<sup>10</sup>), a local crustal model at the array  
200 location (here, extracted from the CRUST2.0 database<sup>16</sup>) and a common mantle model (AK135<sup>17</sup>).  
201 The Green functions with this setup are computed for bodywaves only, assuming a range of possible  
202 source depth, and we look at P pulses and consequent depth phases. Finally, since the focal  
203 mechanism is known (from the moment tensor inversion), we can compute synthetic beams for the  
204 proper mechanism and different depths and compare them to the observed beam.  
205 The algorithm used is open source (<https://github.com/HerrMuellerluedenscheid/abedeto>). The  
206 method is suited for shallow seismicity and it has been successfully applied in recent applications  
207 for natural and induced seismicity and explosion signals<sup>18,19,20,21</sup>.

208

209 Suppl. Fig. 14 shows the comparison of observed and modeled beams at the GERES array, similar  
210 as in Fig. 4, for the three largest earthquakes of the Castor sequence.

211

212

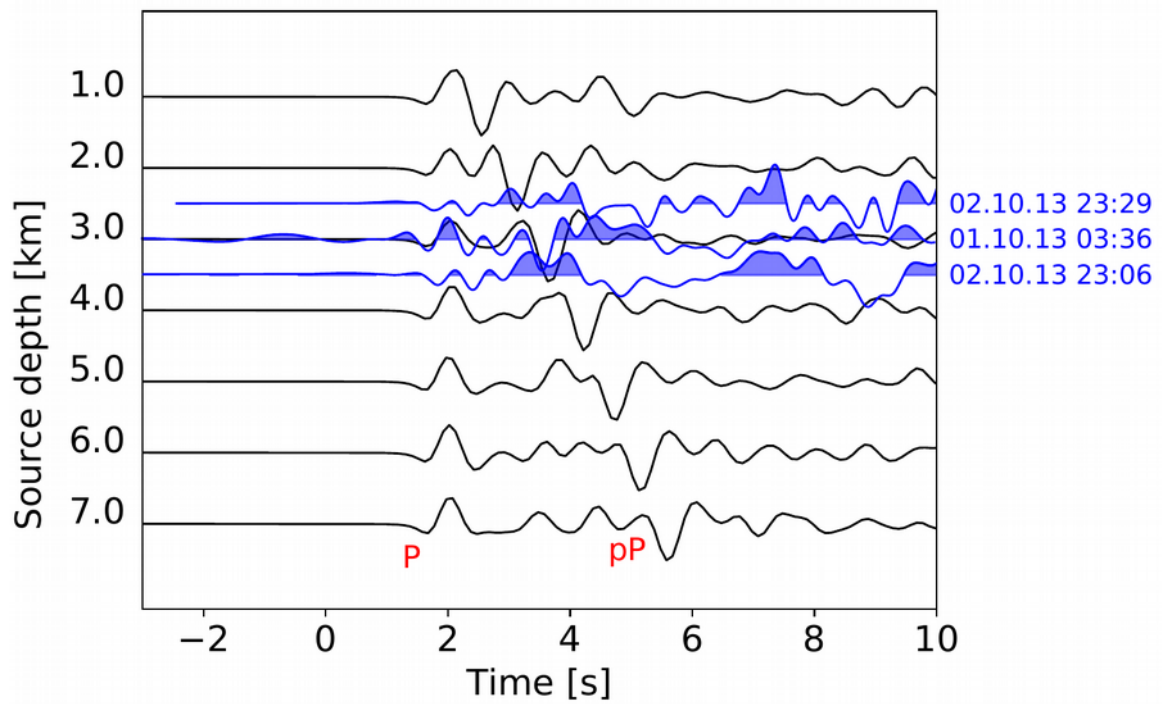

213

214 **Supplementary Fig. 14: Comparison of observed beams for the three largest earthquake at**  
 215 **GERES, compared to synthetics for different source depths.**

216 Observed beams are in blue, and the name of the event is listed, synthetic for the reference  
 217 mechanism (Fig. 5) in black. Model G is used. Red P and pP labels mark the arrival time at 7 km  
 218 depth, where they are well separated.

219

220

221 **Supplementary Note 9, Rupture directivity**

222 Results of the rupture directivity analysis are reported in Supplementary Table 3.

223 The stability of the apparent source time function duration (ASTF) estimations is illustrated in

224 Suppl. Fig. 15, where we compare results using different earthquakes as empirical Green's

225 functions.

226

|                         | Earthquake 1<br>(2013-10-01 03:32) | Earthquake 2<br>(2013-10-02 23:06) |
|-------------------------|------------------------------------|------------------------------------|
| Directivity (°)         | 15 ± 15                            | 17 ± 19                            |
| Rupture asymmetry (%)   | 66 ± 6                             | 75 ± 7                             |
| Rupture length (km)     | 1.0 ± 0.6                          | 1.2 ± 0.6                          |
| Rupture velocity (km/s) | 2.7 ± 3.5                          | 2.7 ± 2.3                          |
| Total rupture time (s)  | 0.50 ± 0.14                        | 0.47 ± 0.13                        |
| Rise time (s)           | 0.25                               | 0.15                               |

227 **Supplementary Tab. 3: Results of the EGF analysis.**

228 The table reports directivity direction, percentage of rupture asymmetry (100% means purely

229 unilateral rupture, 50% purely bilateral rupture, rupture length, rupture velocity, rupture time and

230 rise time, and their uncertainties (the rise time was here fixed), for the two target earthquakes on

231 October 1, 2013, 03:32 UTC and October 2, 2013, 23:06.

232

233

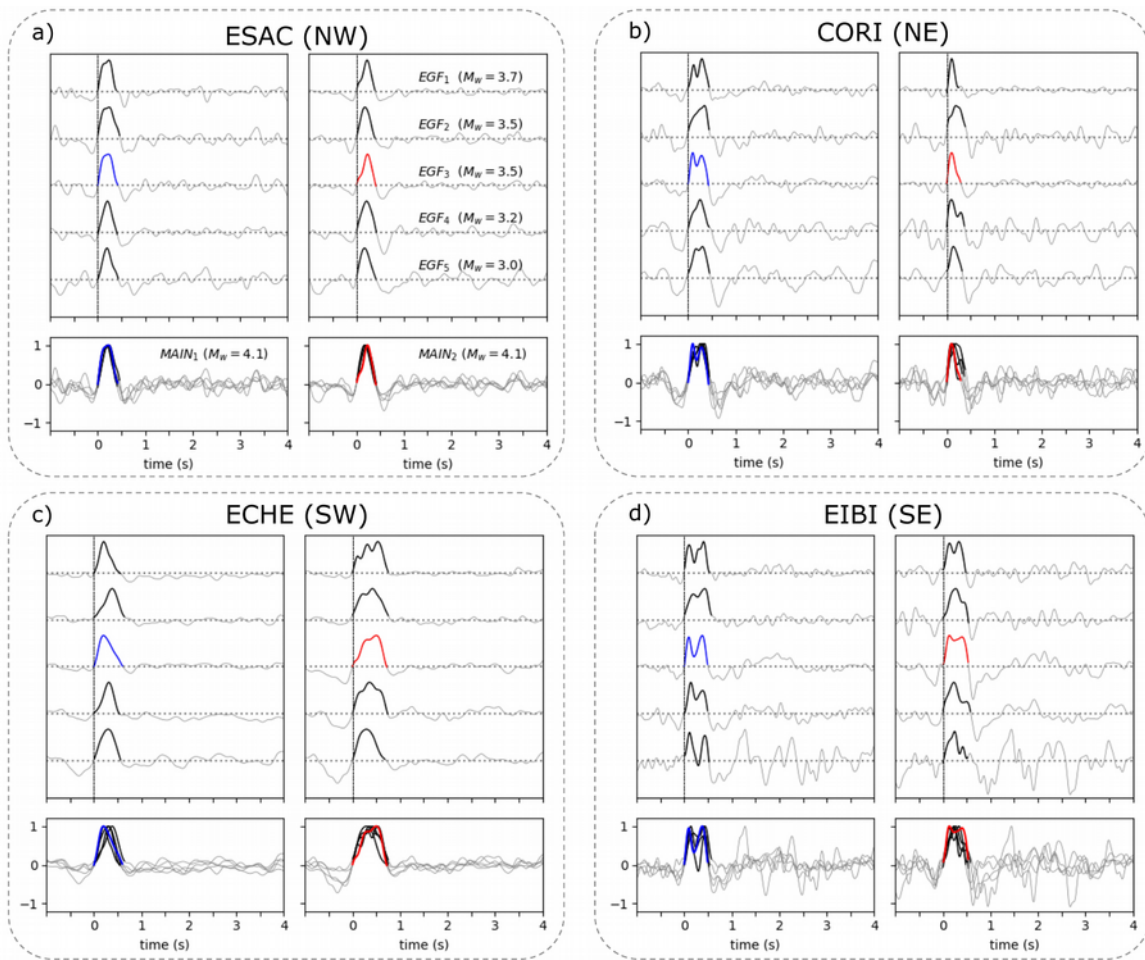

234

235 **Supplementary Fig. 15: Stability of Apparent Source Time Function (ASTF) estimation.**

236 Comparison of results using different earthquakes as Empirical Green's Functions (EGFs) for the

237 October 1, 2013, 1 (first column in each panel) and October 2, 2013, (second column)  $M_w$  4.1

238 earthquakes. ASTFs are obtained using different EGFs (EGF1 October 4, 2013, 08:49, EGF2

239 September 24, 2013, 00:21, EGF3: October 4, 2013, 09:55, EGF4: September 29, 2013, 21:15,

240 EGF5: October 4, 2013, 20:02), for seismic stations located NW (**a**, station ESAC), NE (**b**, CORI),

241 SW (**c**, ECHE) and SE (**d**, EIBI) of the focal region. ASTFs are labeled (a) for each EGF, sorted by

242 decreasing seismic moment. The bottom row in each panel shows the overlapped normalized

243 ASTFs. Gray traces show the deconvolved functions from S waves through spectral division and

244 the resulting ASTF is highlighted with a black line. We finally select the October 4, 2013, 09:55 as

245 EGF (blue and red traces are used for P and S phases respectively, for the ASTF obtained for the

246 selected EGF and in bottom panels).

247



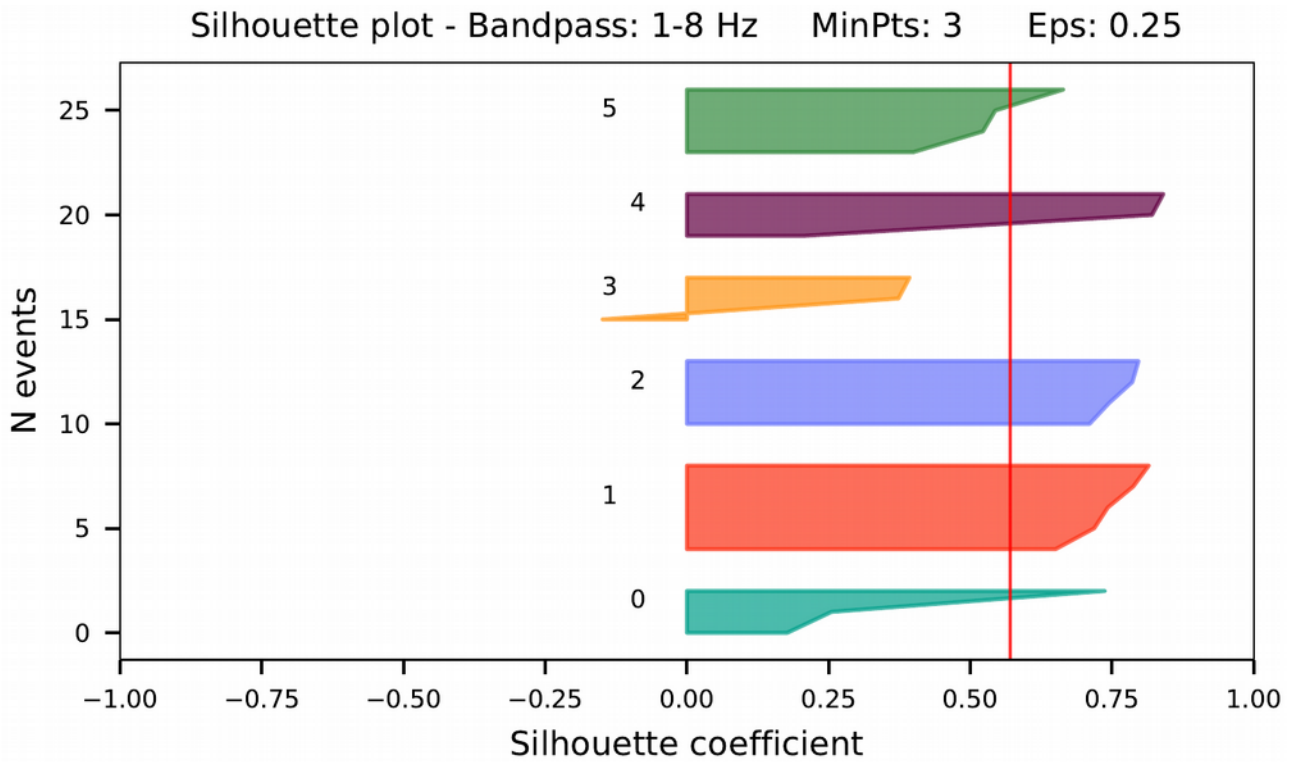

251 **Supplementary Fig. 16: Silhouette plot for the waveform based clustering results.**

252 The silhouette plot shows that the clusters identified in the Castor sequence are in general well  
 253 separated from each other. The silhouette coefficient is a measure for the similarity of an event in  
 254 regard to other events in its cluster compared to the similarity to events in other clusters. Here, the  
 255 silhouette coefficients of the events of one cluster form a polygon with rather rectangular shapes  
 256 indicating more homogeneous clusters. A negative value indicates that an event might be better  
 257 assigned to another cluster. Clusters are colored according to Fig. 7.

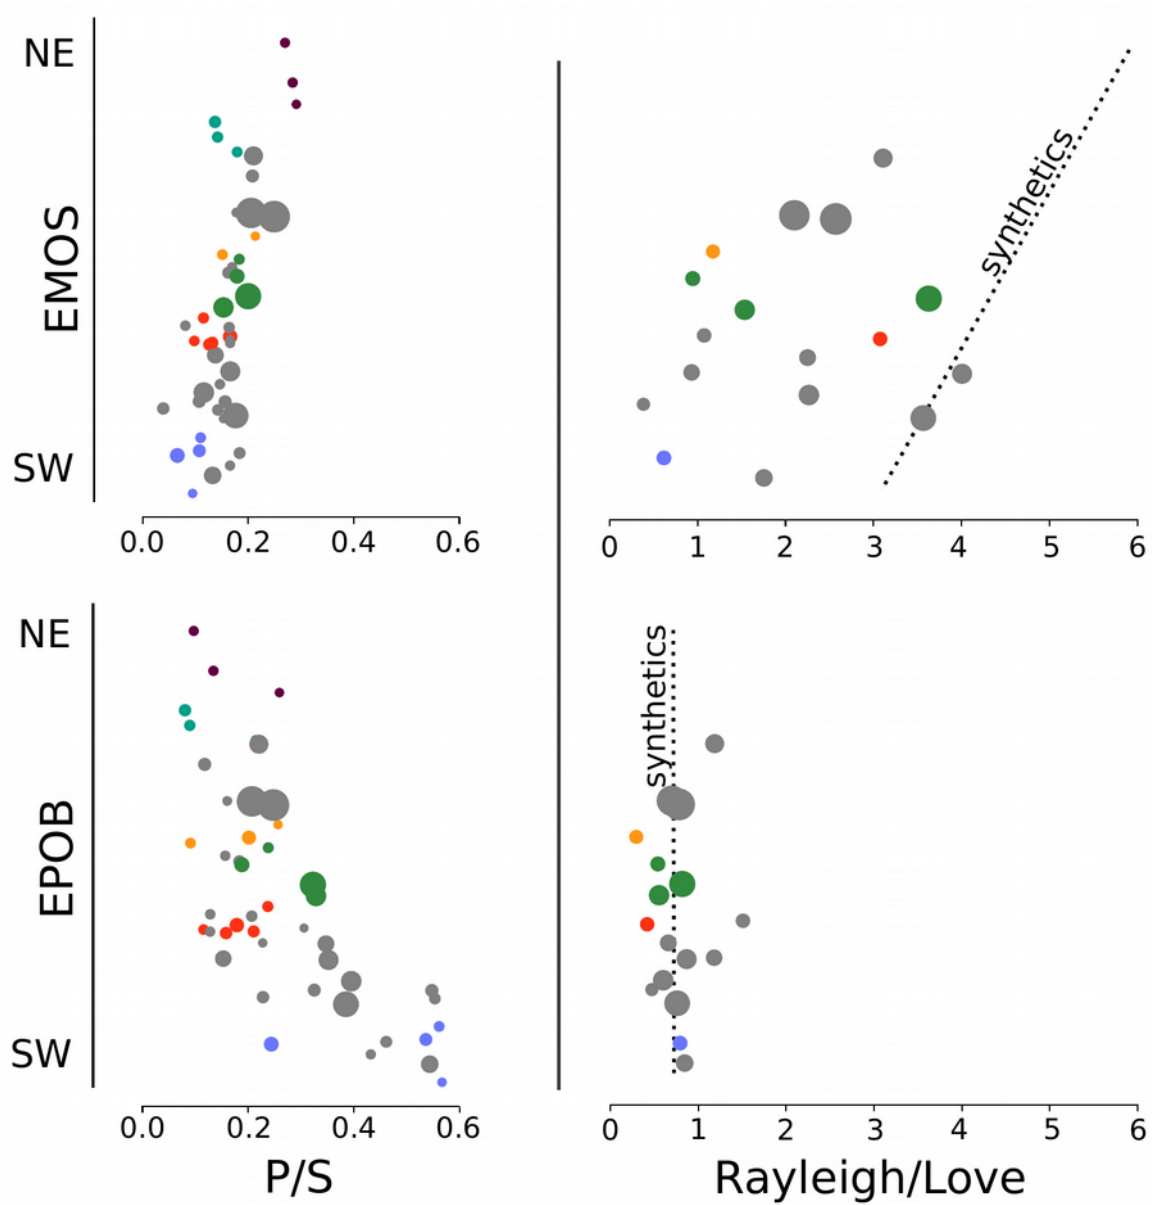

260

261 **Supplementary Fig. 17: Waveform based clustering results: modeling of P/S and**

262 **Rayleigh/Love ratios along a NE-SW profile.**

263 The ratios P/S at station EPOB and R/L at station EMOS show smooth trends along the NE-SW

264 profile CD (Fig. 2). Clusters are colored according to Fig. 7.

265 **Supplementary References**

266 1. Foulger, G. R., Wilson, M. P., Gluyas, J. G., Julian, B. R. & Davies, R. J. Global review of  
267 human-induced earthquakes. *Earth-Science Reviews* **178**, 438-514,  
268 <https://doi.org/10.1016/j.earscirev.2017.07.008> (2018).

269 2. Cesca, S., et al. Source modelling of the M5–6 Emilia-Romagna, Italy, earthquakes (2012 May  
270 20–29), *Geophys. J. Int.*, **193**, 3, 1658–1672, <https://doi.org/10.1093/gji/ggt069> (2013).

271 3. Grigoli, F., et al. The November 2017 Mw 5.5 Pohang earthquake: A possible case of induced  
272 seismicity in South Korea. *Science* **360**, 6392, 1003-1006, <https://doi.org/10.1126/science.aat2010>  
273 (2018).

274 4. Instituto Geografico Nacional, Spain. Spanish Digital Seismic Network, International Federation  
275 of Digital Seismograph Networks, <https://doi.org/10.7914/SN/ES> (1999).

276 5. Institut Cartogràfic I Geològic De Catalunya. Catalan Seismic Network. International Federation  
277 of Digital Seismograph Networks, <https://doi.org/10.7914/SN/CA> (1984).

278 6. San Fernando Royal Naval Observatory (ROA), Universidad Complutense De Madrid (UCM),  
279 Helmholtz-Zentrum Potsdam Deutsches GeoForschungsZentrum (GFZ), Universidade De Evora  
280 (UEVORA, Portugal) & Institute Scientifique Of Rabat (ISRABAT, Morocco). The Western  
281 Mediterranean BB seismic Network. Deutsches GeoForschungsZentrum GFZ.  
282 <https://doi.org/10.14470/JZ581150> (1996).

283 7. Institute Earth Sciences "Jaume Almera" CSIC (ICTJA Spain), IberArray. International  
284 Federation of Digital Seismograph Networks, <https://doi.org/10.7914/SN/IB> (2007).

285 8. Federal Institute for Geosciences and Natural Resources (BGR), German Regional Seismic  
286 Network (GRSN), <https://doi.org/10.25928/mbx6-hr74> (1976).

287 9. Cesca, S., et al. The 2013 september-october seismic sequence offshore spain: a case of  
288 seismicity triggered by gas injection? *Geophys. J. Int.* **198**, 941–953,  
289 <https://doi.org/10.1093/gji/ggu172> (2014).

- 290 10. Gaite, B., Ugalde, A., Villaseñor, A. & Blanch, E. Improving the location of induced  
291 earthquakes associated with an underground gas storage in the Gulf of Valencia (Spain), *Phys.*  
292 *Earth Planet. Int.*, **254**, 46-59, <https://doi.org/10.1016/j.pepi.2016.03.006> (2016).
- 293 11. Mezcua, J. & Martinez Solares, J. M. Sismicidad del Area Ibero-Mogrebi, Instituto Geográfico  
294 Nacional Publ., Madrid, 189 pp. (1983).
- 295 12. Vidal, N., Gallart, J., Dañobeitia, J. J. A deep seismic crustal transect from the NE Iberian  
296 Peninsula to the western Mediterranean. *J. Geophys. Res.* **103** (B6), 12381–12396.  
297 <http://dx.doi.org/10.1029/98JB00076> (1998).
- 298 13. González, Á. The Spanish National Earthquake Catalogue: Evolution, precision and  
299 completeness, *J. Seismol.* **21**, 3, 435-471 (2017).
- 300 14. Wiemer, S. & Wyss, M. Minimum magnitude of completeness in earthquake catalogs: examples  
301 from Alaska, the Western United States & Japan, *Bull. seism. Soc. Am.* **90**, 859–869.  
302 <https://doi.org/10.1785/0119990114> (2000).
- 303 15. Wang, R., A simple orthonormalization method for the stable and efficient computation of  
304 Green's functions, *Bull. Seismol. Soc. Am.*, **89**, 733-741 (1999).
- 305 16. Bassin, C., Laske, G. & Masters, G. The Current Limits of Resolution for Surface Wave  
306 Tomography in North America, *EOS Trans AGU*, **81**, F897 (2000).
- 307 17. Kennett B.L.N., Engdahl E.R. & Buland R. Constraints on seismic velocities in the earth from  
308 travel times, *Geophys. J. Int.*, **122**, 108-124 (1995).
- 309 18, Negi, S. S., Paul, A., Cesca, S., Kamal, Kriegerowski, M., Mahesh, P. & Gupta, S. Crustal  
310 velocity structure and earthquake processes of Garhwal-Kumaun Himalaya: Constraints from  
311 regional waveform inversion and array beam modeling. *Tectonophysics*, **712-713**, 45-63,  
312 <https://doi.org/10.1016/j.tecto.2017.05.007> (2017).
- 313 19. Gaebler, P., Ceranna, L., Nooshiri, N., Barth, A., Cesca, S., Frei, M., Grünberg, I., Hartmann,  
314 G., Koch, K., Pilger, C., Ross, J. O. & Dahm, T. 2019, A multi-technology analysis of the 2017  
315 North Korean nuclear test, *Solid Earth*, **10**, 59-78, <https://doi.org/10.5194/se-10-59-2019>

- 316 20. Mouslopoulou, V., Bocchini, G. M., Cesca, S., Saltogianni, V., Bedford, J., Petersen, G.,  
317 Gianniou, M. & Oncken, O. Earthquake Swarms, Slow Slip and Fault Interactions at the Western-  
318 End of the Hellenic Subduction System Precede the Mw6.9 Zakynthos Earthquake, Greece,  
319 *Geochemistry Geophysics Geosystems (G3)*, **21**, 12, <https://doi.org/10.1029/2020GC009243> (2020).
- 320 21. Büyükakpınar, P., Cesca, S., Hainzl, S., Jamalreyhani, M., Heimann, S., & Dahm, T. Reservoir-  
321 triggered earthquakes around the Atatürk Dam (southeastern Turkey), *Frontiers in Earth Science*,  
322 <https://doi.org/10.3389/feart.2021.663385> (2021).
