# Supplementary material for: Seismicity at the Castor gas reservoir driven by pore pressure diffusion and asperities loading
Source: PubMed Central journal article supplement (PMC8355105; doi:10.1038/s41467-021-24949-1), 2021-08-10
Supplement: 41467_2021_24949_MOESM3_ESM.pdf [file 41467_2021_24949_MOESM3_ESM.pdf]

## **Description of Additional Supplementary Files**

File name: Supplementary Data 1

Description: Template matching catalog, including 3,437 events .

File name: Supplementary Data 2

Description: Relative location catalog based on waveform correlation, including 51 events .

File name: Supplementary Data 3

Description: Relocated catalog based on tS-tP and distance geometry technique, including 408 events.
